# Supplementary material for: Rewilding landscapes with apex predators: cheetah (Acinonyx jubatus) movements reveal the importance of environmental and individual contexts
Source: Frontiers journal article supplement (doi:10.3389/fcosc.2024.1351366), 2024-05-08
Supplement: Data_Sheet_1.pdf [file Data_Sheet_1.pdf]

## Rewilding landscapes with apex predators: Cheetah movements reveal the importance of environmental and individual contexts

Dimbleby, J., Cristescu, B. \*, Bandyopadhyay, K., Rooney, N.J., Marker, L.

\* [bogdan@cheetah.org](mailto:bogdan@cheetah.org)

### Supplementary Figures and Tables

**Table S1.** Vehicle-driven transect characteristics for estimating density of cheetah prey.

| <b>Farm</b>                      | <b>Area (km<sup>2</sup>)</b> | <b>Monitoring started</b> | <b>Vehicle transect length (km)</b> |
|----------------------------------|------------------------------|---------------------------|-------------------------------------|
| Bellebenno (363)                 | 73                           | 2002                      | 17.4                                |
| Boskop (324)                     | 50.8                         | 2001                      | 13.9                                |
| Byanadaar (361)                  | 73                           | 2004/05                   | 19.6                                |
| Cheetah View (317)               | 50.5                         | 1998/99                   | 17.3                                |
| Elandsvreugde (367)              | 73                           | 1994                      | 27.5 (A), 21.0 (B)                  |
| Janhelpman (358)                 | 73                           | 2002                      | 15                                  |
| Osonanga (368/00REM + 368/00001) | 70.3                         | 2001                      | 22.4                                |
| Padberg (323/00REM)              | 40                           | 2019                      | 22                                  |
| Otjenga (362)                    | 73.1                         | 2020                      | 22.1                                |
| 576.7                            | 576.7                        | 576.7                     | 576.7                               |

**Table S2.** Correlation matrix of factors tested for association with cheetah step length. Covariate pairs that were highly correlated ( $|r| > 0.6$ ) are displayed in the table.

| <b>Variable 1</b>             | <b>Variable 2</b>             | <b>Correlation (<math> r </math>)</b> |
|-------------------------------|-------------------------------|---------------------------------------|
| Small Prey                    | Male (sex)                    | 0.88                                  |
| Large Prey                    | Male (sex)                    | 0.88                                  |
| Distance to edge              | Distance to marking tree      | 0.67                                  |
| Distance to edge <sup>2</sup> | Distance to marking tree      | 0.65                                  |
| Distance to marking tree      | Distance to edge              | 0.67                                  |
| Distance to edge <sup>2</sup> | Distance to edge              | 0.97                                  |
| Distance to marking tree      | Distance to edge <sup>2</sup> | 0.65                                  |
| Distance to edge              | Distance to edge <sup>2</sup> | 0.97                                  |
| Male (sex)                    | Small Prey                    | 0.88                                  |
| Large Prey                    | Small Prey                    | 0.91                                  |
| Male (sex)                    | Large Prey                    | 0.88                                  |
| Small Prey                    | Large Prey                    | 0.91                                  |

**Table S3.** Results of one-way ANOVA with post-hoc Tukey tests to assess whether average step lengths were statistically different among the four cheetah classes.

| <b>Class</b>                                 | <b>difference</b> | <b>lower</b> | <b>upper</b> | <b><i>p</i> adjusted</b> |
|----------------------------------------------|-------------------|--------------|--------------|--------------------------|
| Rehab Local                                  | 103.96            | -2392.61     | 2600.52      | 1                        |
| Rehab Translocated                           | -180.93           | -2671.27     | 2309.42      | 1                        |
| Wild Local                                   | 357.04            | -2133.59     | 2847.67      | 1                        |
| Wild Rehab Translocated                      | -277.91           | -2770.67     | 2214.86      | 1                        |
| Rehab Translocated x Rehab Local             | -284.88           | -473.64      | -96.13       | <0.001***                |
| Wild Local x Rehab Local                     | 253.08            | 60.49        | 445.67       | 0.003**                  |
| Wild Rehab Translocated x Rehab Local        | -381.86           | -600.30      | -163.43      | <0.001***                |
| Wild Local x Rehab Translocated              | 537.97            | 460.14       | 615.79       | 0***                     |
| Wild Rehab Translocated x Rehab Translocated | -96.98            | -226.13      | 32.17        | 0.24                     |
| Wild Rehab Translocated x Wild Local         | -634.95           | -769.64      | -500.25      | 0***                     |

**Table S4.** Results from one-way ANOVA with post-hoc Tukey tests assessing differences in average step lengths among three seasons.

| <b>Season</b>      | <b>difference</b> | <b>lower</b> | <b>upper</b> | <b><i>p</i> adjusted</b> |
|--------------------|-------------------|--------------|--------------|--------------------------|
| Cold-Dry           | -151.42           | -2570.26     | 2267.43      | 1                        |
| Hot-Dry            | 118.37            | -2300.85     | 2537.60      | 1                        |
| Hot-Wet            | 76.00             | -2342.84     | 2494.85      | 1                        |
| Hot-Dry x Cold-Dry | 269.79            | 180.22       | 359.36       | 0***                     |
| Hot-Wet x Cold-Dry | 227.42            | 148.70       | 306.14       | 0***                     |
| Hot-Wet x Hot-Dry  | -42.37            | -131.82      | 47.08        | 0.62                     |

**Table S5.** Results of Welch two sample t-test comparing step lengths of male and female cheetahs.

| Statistic                 | value            |
|---------------------------|------------------|
| t-value                   | 16.916           |
| df                        | 2321.3           |
| <i>p</i> -value           | <2.2e-16         |
| Confidence Interval (95%) | (476.65, 601.65) |
| Mean of Male              | 903.253          |
| Mean of Female            | 364.104          |

**Table S6.** The proportion of steps in relation to Big Field and the average step length for the four classes of cheetah. ‘Intersections’ represent steps that cross the open savanna-woodland savanna habitat edge, ‘Inside’ are steps within the Big Field and ‘Outside’ are steps outside the Big Field.

| Class        | Proportion of steps |        |         | Average step length |          |          |
|--------------|---------------------|--------|---------|---------------------|----------|----------|
|              | Intersections       | Inside | Outside | Intersection        | Inside   | Outside  |
| Wild Local   | 0.295               | 0.289  | 0.710   | 1932.409            | 1517.869 | 982.339  |
| Rehab        | 0.0424              |        |         |                     |          |          |
| Translocated |                     | 0.137  | 0.907   | 1100.694            | 486.328  | 365.307  |
| Rehab Local  | 0.0523              | 0.158  | 0.841   | 1479.155            | 872.196  | 1479.155 |
| Wild Rehab   | 0.0185              |        |         |                     |          |          |
| Translocated |                     | 0.0510 | 0.948   | 1461.192            | 575.494  | 262.307  |

**Table S7.** Ranking of hypotheses on ecological factors associated with step lengths of Wild Local cheetahs. K represents the numbers of covariates per model, where model 2 only contains the intercept. Supported models are those with  $\Delta\text{AICc} < 2$ . AICc weight, Cumulative weight, and Log likelihood (LL) are also reported.

| Model | K | AICc    | Delta_AICc | AICcWt | Cum_Wt | LL       |
|-------|---|---------|------------|--------|--------|----------|
| 1     | 8 | 4224.63 | 0          | 0.93   | 0.93   | -2103.32 |
| 6     | 5 | 4230.14 | 5.51       | 0.06   | 0.99   | -2109.07 |
| 8     | 7 | 4234.11 | 9.48       | 0      | 1      | -2109.05 |
| 4     | 4 | 4416.69 | 192.06     | 0      | 0.93   | -2203.35 |
| 7     | 5 | 4417.90 | 193.27     | 0      | 0.99   | -2202.95 |
| 3     | 4 | 4421.05 | 196.42     | 0      | 0.93   | -2205.53 |
| 9     | 6 | 4422.23 | 197.60     | 0      | 1      | -2204.12 |
| 5     | 5 | 4423.32 | 198.68     | 0      | 0.93   | -2205.66 |
| 2     | 1 | 4682.66 | 458.03     | 0      | 0.93   | -2339.33 |

**Table S8.** Ranking of hypotheses on ecological factors associated with step lengths of Rehabilitated Local cheetahs. K represents the numbers of covariates per model, where model 2 only contains the intercept. Supported models are those with  $\Delta\text{AICc} < 2$ . AICc weight, Cumulative weight, and Log likelihood (LL) are also reported.

| <b>Model</b> | <b>K</b> | <b>AICc</b> | <b>Delta_AICc</b> | <b>AICcWt</b> | <b>Cum_Wt</b> | <b>LL</b> |
|--------------|----------|-------------|-------------------|---------------|---------------|-----------|
| 8            | 7        | 503.49      | 0                 | 0.27          | 0.94          | -243.74   |
| 6            | 5        | 503.88      | 0.39              | 0.22          | 0.57          | -245.94   |
| 3            | 4        | 505.03      | 1.54              | 0.13          | 0.24          | -247.52   |
| 1            | 8        | 505.25      | 1.76              | 0.11          | 0.11          | -243.63   |
| 7            | 5        | 505.53      | 2.04              | 0.10          | 0.67          | -246.76   |
| 4            | 4        | 505.77      | 2.28              | 0.09          | 0.33          | -247.88   |
| 9            | 6        | 506.52      | 3.04              | 0.06          | 1             | -246.26   |
| 5            | 5        | 508.97      | 5.48              | 0.02          | 0.34          | -248.49   |
| 2            | 1        | 530.84      | 27.35             | 0             | 0.11          | -263.42   |



**Table S9.** Ranking of hypotheses on ecological factors associated with step lengths of Rehabilitated Translocated cheetahs. K represents the numbers of covariates per model, where model 2 only contains the intercept. Supported models are those with  $\Delta\text{AICc} < 2$ . AICc weight, Cumulative weight, and Log likelihood (LL) are also reported.

| Model | K | AICc    | Delta_AICc | AICcWt | Cum_Wt | LL       |
|-------|---|---------|------------|--------|--------|----------|
| 1     | 8 | 7362.42 | 0          | 0.92   | 0.92   | -3672.21 |
| 6     | 5 | 7368.49 | 6.07       | 0.04   | 0.96   | -3678.25 |
| 8     | 7 | 7368.84 | 6.41       | 0.04   | 1      | -3676.42 |
| 5     | 5 | 7590.05 | 227.63     | 0      | 0.92   | -3789.03 |
| 9     | 6 | 7591.57 | 229.14     | 0      | 1      | -3788.78 |
| 3     | 4 | 7601.51 | 239.08     | 0      | 0.92   | -3795.75 |
| 7     | 5 | 7601.69 | 239.27     | 0      | 0.96   | -3794.85 |
| 4     | 4 | 7602.43 | 240.01     | 0      | 0.92   | -3796.22 |
| 2     | 1 | 7662.43 | 300.01     | 0      | 0.92   | -3829.22 |

**Table S10.** Ranking of hypotheses on ecological factors associated with step lengths of Wild Rehabilitated Translocated cheetahs. K represents the numbers of covariates per model, where model 2 only contains the intercept. Supported models are those with  $\Delta\text{AICc} < 2$ . AICc weight, Cumulative weight, and Log likelihood (LL) are also reported.

| Model | K | AICc    | Delta_AICc | AICcWt | Cum_Wt | LL      |
|-------|---|---------|------------|--------|--------|---------|
| 8     | 7 | 1121.64 | 0          | 0.86   | 1      | -552.82 |
| 1     | 8 | 1126.35 | 4.71       | 0.08   | 0.082  | -554.18 |
| 6     | 5 | 1127.17 | 5.53       | 0.05   | 0.14   | -557.59 |
| 7     | 5 | 1150.12 | 28.47      | 0      | 0.14   | -569.06 |
| 4     | 4 | 1153.39 | 31.75      | 0      | 0.08   | -571.69 |
| 5     | 5 | 1158.09 | 36.44      | 0      | 0.08   | -573.04 |
| 9     | 6 | 1158.81 | 37.17      | 0      | 1      | -572.41 |
| 3     | 4 | 1165.08 | 43.43      | 0      | 0.08   | -577.54 |
| 2     | 1 | 1226.12 | 104.48     | 0      | 0.08   | -611.06 |

**Table S11.** Covariates associated with cheetah movements based on supported models ranked in an AIC framework ( $\Delta AIC < 2$ ). Estimates for which confidence intervals did not overlap zero are highlighted with an asterisk. Mixed effects model for cheetah class as random intercept.

| Hypothesis | Covariate    | Estimate             | p-value   |
|------------|--------------|----------------------|-----------|
| 6          | Intercept    | -2.54e-11 (+/- 0.91) | 1         |
|            | Inside       | -0.07 (+/- 0.92)     | 0.94      |
|            | Intersection | 0.89 (+/- 0.92)      | 0.34      |
|            | Outside      | -0.19 (+/- 0.92)     | 0.83      |
|            | Crepuscular  | 0.28 (+/- 0.03)      | <0.001*** |
|            | Day          | -0.01 (+/- 0.03)     | 0.66      |

**Table S12.** Ranking of hypotheses on ecological factors associated with step lengths all cheetahs with cheetah class as the random intercept. K represents the numbers of covariates per model, where model 2 only contains the intercept. Supported models are those with  $\Delta\text{AIC} < 2$ . AIC weight, Cumulative weight, and Log likelihood (LL) are also reported.

| Model | K  | AIC      | Delta_AIC | AICWt | Cum_Wt | LL       |
|-------|----|----------|-----------|-------|--------|----------|
| 6     | 8  | 12932.73 | 0         | 1     | 1      | -6458.37 |
| 1     | 10 | 12941.70 | 8.97      | 0     | 0      | -6460.85 |
| 8     | 9  | 12945.03 | 12.3      | 0     | 1      | -6463.52 |
| 4     | 6  | 13521.53 | 588.8     | 0     | 0      | -6754.77 |
| 7     | 7  | 13523.83 | 591.1     | 0     | 1      | -6754.91 |
| 3     | 6  | 13529.12 | 596.39    | 0     | 0      | -6758.56 |
| 9     | 8  | 13540.38 | 607.65    | 0     | 1      | -6762.19 |
| 5     | 7  | 13540.43 | 607.7     | 0     | 0      | -6763.22 |
| 2     | 3  | 13734.34 | 801.61    | 0     | 0      | -6864.17 |

**Table S13.** R2 values from the mixed effects model for cheetah class as random intercept.

| <b>aic</b> | <b>bic</b> | <b>r2.conditional</b> | <b>r2.marginal</b> | <b>icc</b> | <b>rmse</b> | <b>nobs</b> |
|------------|------------|-----------------------|--------------------|------------|-------------|-------------|
| 12932.73   | 12984.81   | 0.20                  | 0.15               | 0.057      | 0.88        | 4966        |

**Table S14.** Covariates associated with cheetah movements based on supported models ranked in an AIC framework ( $\Delta\text{AIC} < 2$ ). Estimates for which confidence intervals did not overlap zero are highlighted with an asterisk. Mixed effects model for Individual ID as random intercept.

| Hypothesis | Covariate    | Estimate             | p-value   |
|------------|--------------|----------------------|-----------|
| 6          | Intercept    | -2.52e-11 (+/- 0.92) | 1         |
|            | Inside       | -0.05 (+/- 0.92)     | 0.96      |
|            | Intersection | 0.88 (+/- 0.92)      | 0.34      |
|            | Outside      | -0.19 (+/- 0.92)     | 0.83      |
|            | Crepuscular  | 0.29 (+/- 0.03)      | <0.001*** |
|            | Day          | -4.11e-3 (+/- 0.03)  | 0.90      |

**Table S15.** Ranking of hypotheses on ecological factors associated with step lengths all cheetahs with Individual ID as the random intercept. K represents the numbers of covariates per model, where model 2 only contains the intercept. Supported models are those with  $\Delta AIC < 2$ . AIC weight, Cumulative weight, and Log likelihood (LL) are also reported.

| Model | K  | AIC      | Delta_AIC | AICWt | Cum_Wt | LL       |
|-------|----|----------|-----------|-------|--------|----------|
| 6     | 8  | 12922.55 | 0         | 1     | 1      | -6453.28 |
| 1     | 10 | 12933.52 | 10.97     | 0     | 0      | -6456.76 |
| 8     | 9  | 12936.86 | 14.31     | 0     | 1      | -6459.43 |
| 4     | 6  | 13494.38 | 571.82    | 0     | 0      | -6741.20 |
| 7     | 7  | 13507.94 | 575.97    | 0     | 1      | -6742.27 |
| 3     | 6  | 13507.94 | 585.39    | 0     | 0      | -6747.97 |
| 5     | 7  | 13518.81 | 596.26    | 0     | 0      | -6752.41 |
| 9     | 8  | 13519.26 | 596.70    | 0     | 1      | -6751.63 |
| 2     | 3  | 13712.95 | 790.40    | 0     | 0      | -6853.47 |

**Table S16.** R2 values from the mixed effects model for Individual ID as random intercept.

| <b>aic</b> | <b>bic</b> | <b>r2.conditional</b> | <b>r2.marginal</b> | <b>icc</b> | <b>rmse</b> | <b>nobs</b> |
|------------|------------|-----------------------|--------------------|------------|-------------|-------------|
| 12922.55   | 12974.63   | 0.22                  | 0.15               | 0.077      | 0.88        | 4966        |



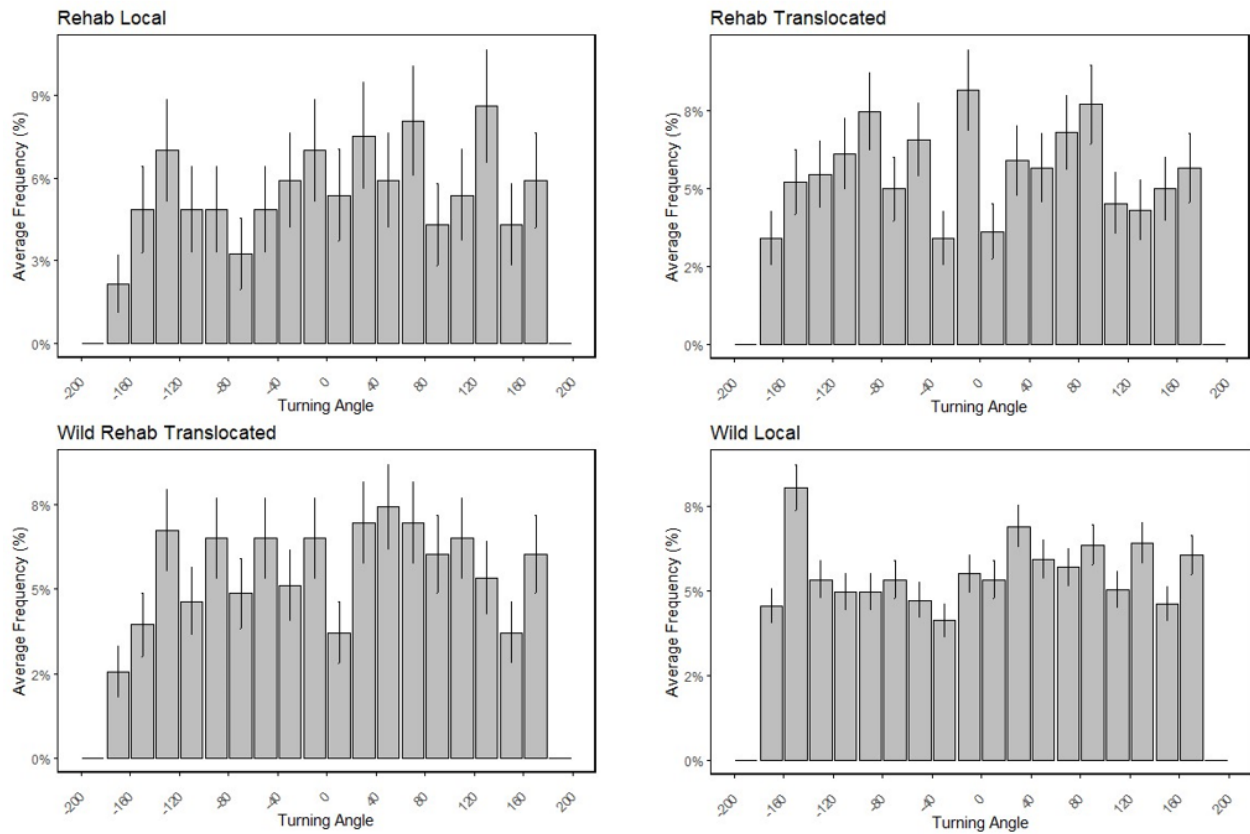

**Figure S1.** Histograms for turning angles of the four classes of cheetah. Average frequencies of turning angles represented as percentages.
